# Supplementary material for: Photochemical mechanistic study of hexafluorobenzene involving the low-lying states
Source: Royal Society of Chemistry journal article supplement (doi:10.1039/d3cp04184k), 2023-12-25
Supplement: d3cp04184k2.pdf [file d3cp04184k2.pdf]

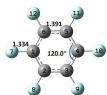

( $S_0$ -MIN,  $D_{6h}$ )

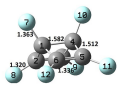

( $S_0$ -P<sub>1</sub>,  $C_{2v}$ )

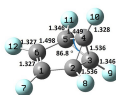

( $S_0$ -P<sub>2</sub>,  $C_{2v}$ )

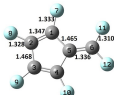

( $S_0$ -P<sub>3</sub>,  $C_{2v}$ )

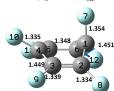

( $S_0$ -TS<sub>1</sub>)

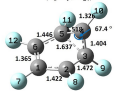

( $S_0$ -TS<sub>2</sub>)

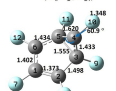

( $S_0$ -IM<sub>1</sub>)

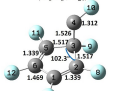

( $S_0$ -IM<sub>2</sub>,  $C_v$ )

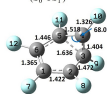

( $S_0$ -TS<sub>2b</sub>)

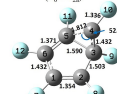

( $S_0$ -TS<sub>2c</sub>)

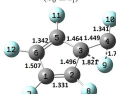

( $S_0$ -TS<sub>3</sub>)

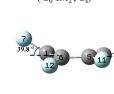

( $S_1$ -MIN)

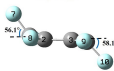

( $S_2$ -MIN,  $C_v$ )

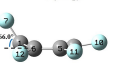

( $T_1$ -MIN,  $C_v$ )

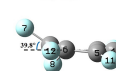

( $T_2$ -MIN)
