# Supplementary material for: Photochemical mechanistic study of hexafluorobenzene involving the low-lying states
Source: Royal Society of Chemistry journal article supplement (doi:10.1039/d3cp04184k), 2023-12-25
Supplement: d3cp04184k3.pdf [file d3cp04184k3.pdf]

# Photochemical mechanistic study of hexafluorobenzene involving the low-lying states

Duoduo Li,<sup>a,b</sup> Xinli Song,<sup>\*,a,b</sup> Jinming Liu,<sup>a,b</sup> Song Zhang,<sup>\*,a,b</sup>

<sup>a</sup>State Key Laboratory of Magnetic Resonance and Atomic and Molecular Physics, Innovation, Academy for Precision Measurement Science and Technology, Chinese Academy of Sciences, Wuhan 430071, P R China

<sup>b</sup>University of Chinese Academy of Sciences, Beijing 100049, P R China

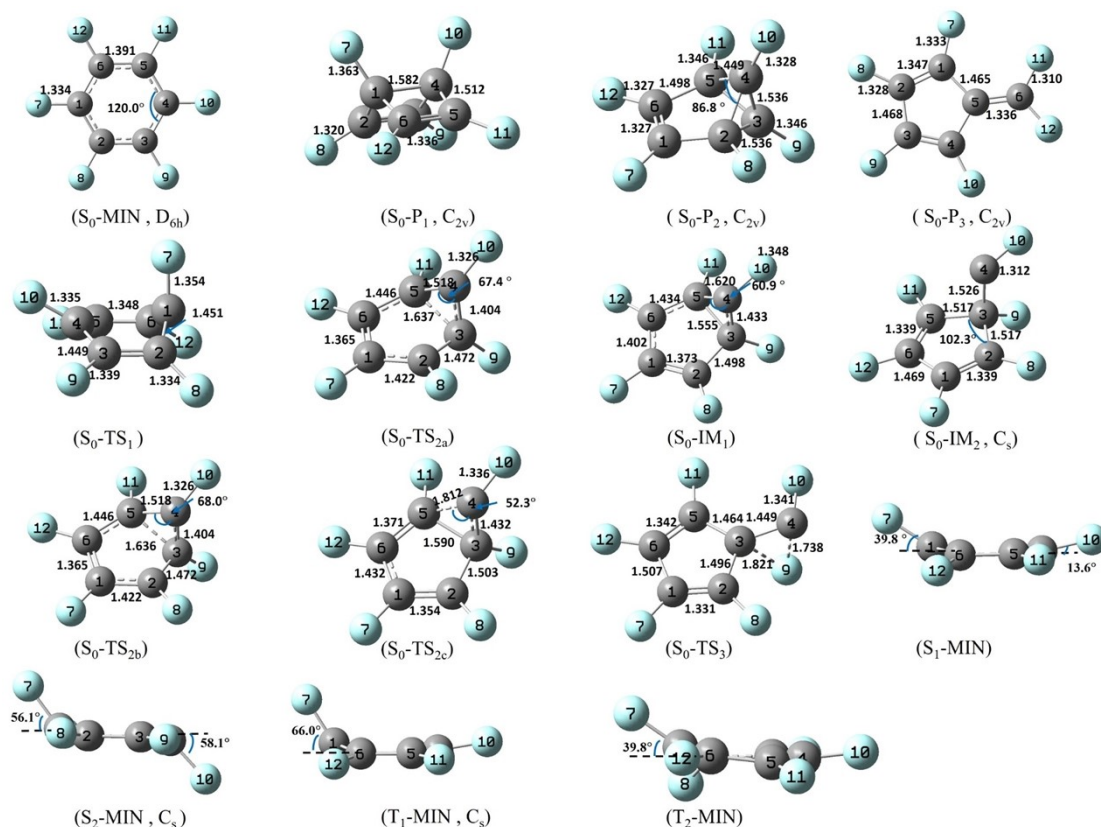

**Fig. S1** Optimized geometries of all the possible stationary points at the B3LYP/6-311G\*\* level (Unit: Å, °).

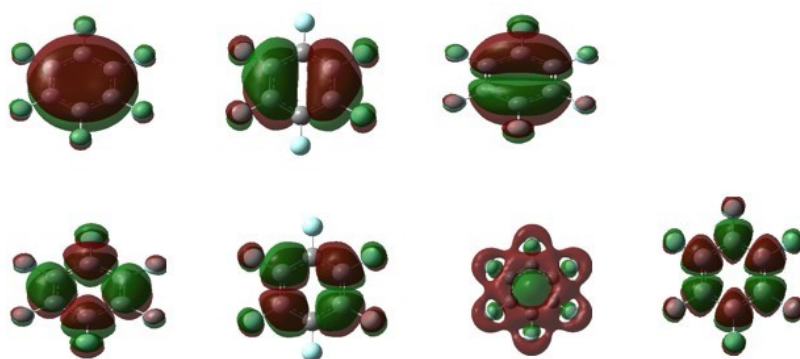

**Fig. S2** Orbitals included in the CASSCF active space at the CAS(6,7)/6-31G\* level.

**Table S1.** The HOMO and LUMO orbitals of HFBCl<sub>3</sub> at different theoretical levels.

|      | CAS(6,7)/<br>6-31G* | CAS(6,7)/<br>/6-31+G* | B3LYP/<br>6-31G* | B3LYP/<br>6-31+G* | BP86/<br>6-31G* | EOM-CCSD/<br>6-31G* |
|------|---------------------|-----------------------|------------------|-------------------|-----------------|---------------------|
| HOMO |                     |                       |                  |                   |                 |                     |
| LUMO |                     |                       |                  |                   |                 |                     |

**Table S2.** The structural parameters of the critical points in Cartesian coordinates (Å) at the CAS(6, 7)/6-31G\* level.

| $S_0$ |               |               |               |
|-------|---------------|---------------|---------------|
| C     | -1.0755965698 | -0.8763097126 | 0.0000065298  |
| C     | 0.2209864456  | -1.3696452742 | 0.0000037780  |
| C     | 1.2966189679  | -0.4935640532 | 0.0000072298  |
| C     | 1.0757390629  | 0.8761961339  | 0.0000221356  |
| C     | -0.2209928667 | 1.3696897843  | 0.0000451497  |
| C     | -1.2967188219 | 0.4934112245  | 0.0000226168  |
| F     | -2.0962179699 | -1.7070846788 | -0.0000057095 |
| F     | 0.4306460345  | -2.6691005189 | -0.0000037460 |
| F     | 2.5267330019  | -0.9611941726 | -0.0000060436 |
| F     | 2.0957379839  | 1.7074168010  | -0.0000085581 |
| F     | -0.4305751448 | 2.6686540317  | -0.0000111167 |
| F     | -2.5263811234 | 0.9616584340  | -0.0000082659 |

**HFB-P<sub>1</sub>**

---

|   |               |               |               |
|---|---------------|---------------|---------------|
| C | -0.0275987499 | -0.9475035501 | -0.0001042243 |
| C | -0.5668512407 | -0.4191113559 | 1.2987797338  |
| C | 0.1906899298  | 0.6786644778  | 1.2990225006  |
| C | 0.8758554654  | 0.3624460510  | -0.0001044085 |
| C | 0.1913545999  | 0.6791994603  | -1.2993548345 |
| C | -0.5671202553 | -0.4199171744 | -1.2991076238 |
| F | 0.5317654716  | -2.1611900403 | 0.0001477600  |
| F | -1.5926432616 | -0.8082543751 | 2.0068892951  |
| F | 0.1890672424  | 1.7763049458  | 2.0063795820  |
| F | 2.2091022090  | 0.2705848018  | 0.0001490271  |
| F | 0.1895627420  | 1.7773180095  | -2.0060948303 |
| F | -1.5934141527 | -0.8090752505 | -2.0066019773 |

---

**HFB-P<sub>2</sub>**

---

|   |               |               |               |
|---|---------------|---------------|---------------|
| C | 1.2702878042  | -0.6721045822 | 0.0150795339  |
| C | -0.1832392012 | -1.0500717161 | 0.0204095579  |
| C | -0.9937413355 | -0.0075732446 | 0.7283812521  |
| C | -1.0178214665 | 0.0131180400  | -0.7363382099 |
| C | -0.1892053334 | 1.0344947436  | -0.0031163542 |
| C | 1.2673303832  | 0.6610316103  | -0.0004485515 |
| F | 2.2571782216  | -1.5335865859 | -0.0353991254 |
| F | -0.5583855041 | -2.3215756356 | 0.0234404594  |
| F | -1.7045377282 | 0.0068771832  | 1.8278440631  |
| F | -1.7701759490 | 0.0355497194  | -1.8072518978 |
| F | -0.5607272413 | 2.3089424201  | 0.0260577487  |
| F | 2.2508983500  | 1.5252150477  | -0.0593514762 |

---

**HFB-P<sub>3</sub>**

---

|   |               |               |               |
|---|---------------|---------------|---------------|
| C | -0.2415366696 | 1.1695225238  | 0.0000319846  |
| C | -1.5070196922 | 0.7361231736  | -0.0000174146 |
| C | -1.5077236987 | -0.7360929225 | -0.0000251285 |
| C | -0.2407304848 | -1.1699211320 | 0.0000336134  |
| C | 0.6490271689  | -0.0000385615 | 0.0000659133  |
| C | 1.9795291874  | -0.0000067674 | -0.0000095527 |
| F | 0.1925504663  | 2.4107557872  | 0.0000392469  |
| F | -2.6132375799 | 1.4392543153  | -0.0000588375 |
| F | -2.6145052583 | -1.4389033877 | -0.0000426983 |
| F | 0.1938049630  | -2.4106091376 | 0.0000501611  |
| F | 2.7100976929  | 1.0712276646  | -0.0000170539 |
| F | 2.7100679051  | -1.0713125558 | -0.0000172336 |

---

**S<sub>0</sub>-TS<sub>1</sub>**

---

|   |               |              |              |
|---|---------------|--------------|--------------|
| C | -0.3190845272 | 0.0000473129 | 1.1613286994 |
|---|---------------|--------------|--------------|

---

|   |               |               |               |
|---|---------------|---------------|---------------|
| C | 0.2008010774  | -1.2888761821 | 0.6633984449  |
| C | 0.2008010832  | -1.2888759856 | -0.6633983327 |
| C | -0.3190849333 | 0.0000474133  | -1.1613283869 |
| C | 0.2019333320  | 1.2885135724  | -0.6633984303 |
| C | 0.2019332401  | 1.2885135637  | 0.6633983508  |
| F | -1.4912485669 | 0.0005623641  | 1.7760744949  |
| F | 0.7155741874  | -2.1854594097 | 1.4758602457  |
| F | 0.7155740324  | -2.1854592455 | -1.4758602103 |
| F | -1.4912485573 | 0.0005621830  | -1.7760748782 |
| F | 0.7174938544  | 2.1846442558  | -1.4758602267 |
| F | 0.7174937779  | 2.1846441575  | 1.4758602296  |

### **S<sub>0</sub>-TS<sub>2a</sub> (B3LYP)**

|   |             |             |             |
|---|-------------|-------------|-------------|
| C | 1.48067700  | -0.25867800 | -0.01208300 |
| C | 0.39059500  | -1.16046100 | 0.10956800  |
| C | -0.86894900 | -0.53185400 | 0.55669100  |
| C | -1.21086000 | -0.23117700 | -0.77428800 |
| C | -0.47174500 | 0.91627100  | -0.09579000 |
| C | 0.97046500  | 1.01260800  | -0.07530200 |
| F | 2.73911700  | -0.63458400 | -0.23317200 |
| F | 0.48329400  | -2.45880700 | -0.17013300 |
| F | -1.48941600 | -0.67584200 | 1.74359900  |
| F | -2.35573300 | -0.19702900 | -1.44930400 |
| F | -1.20781100 | 1.97475000  | 0.31394900  |
| F | 1.63709200  | 2.16037400  | -0.01080200 |

### **S<sub>0</sub>-TS<sub>2b</sub>**

|   |               |               |               |
|---|---------------|---------------|---------------|
| C | 1.4957605138  | -0.2200998552 | -0.0101959727 |
| C | 0.4571756428  | -1.1592752561 | 0.0703316064  |
| C | -0.8308634399 | -0.5318065532 | 0.4558321992  |
| C | -1.2195643109 | -0.2222207295 | -0.8706415678 |
| C | -0.4885453894 | 0.8909575818  | 0.0103848966  |
| C | 0.9466258766  | 1.0361208036  | 0.0125245783  |
| F | 2.7480575114  | -0.5200282861 | -0.2553931993 |
| F | 0.5901864805  | -2.4411045110 | -0.1589365086 |
| F | -1.4848367010 | -0.8217445776 | 1.5707034845  |
| F | -2.4258697067 | -0.1417249506 | -1.3702518430 |
| F | -1.2630098959 | 1.8833785961  | 0.4381016752  |
| F | 1.5844254187  | 2.1780747379  | 0.0107856513  |

### **S<sub>0</sub>-TS<sub>2c</sub>**

|   |               |               |               |
|---|---------------|---------------|---------------|
| C | 1.5576728462  | -0.2014349316 | -0.0587635389 |
| C | 0.6048132771  | -1.1146092819 | 0.1004332642  |
| C | -0.7681756413 | -0.4494540337 | 0.1735333040  |

|   |               |               |               |
|---|---------------|---------------|---------------|
| C | -1.392581138  | -0.5117990532 | -1.1883980368 |
| C | -0.3673124032 | 1.0204362978  | 0.3055312172  |
| C | 0.9259114856  | 1.1494785927  | 0.0777244339  |
| F | 2.8191364391  | -0.3657364507 | -0.3432248775 |
| F | 0.7053915604  | -2.4348125356 | -0.0495737460 |
| F | -1.5324176379 | -0.8818855919 | 1.1649339708  |
| F | -2.7367386804 | -0.4726588099 | -0.9692445994 |
| F | -1.2838728708 | 1.9374358903  | 0.5459227600  |
| F | 1.6141697640  | 2.2470689178  | 0.0345168485  |

### **S<sub>0</sub>-TS<sub>3</sub>**

|   |             |             |             |
|---|-------------|-------------|-------------|
| C | 1.53064300  | -0.17573200 | -0.04170300 |
| C | 0.60404400  | -1.16604700 | 0.10967400  |
| C | -0.77179600 | -0.60476000 | 0.31754600  |
| C | -1.31382700 | -0.26046600 | -0.96460300 |
| C | -0.50424600 | 0.88926600  | -0.00863600 |
| C | 0.89317000  | 1.08382600  | -0.03210600 |
| F | 2.83798500  | -0.36080900 | -0.29813100 |
| F | 0.80749000  | -2.47822900 | -0.11264400 |
| F | -1.46458300 | -0.98626200 | 1.43061100  |
| F | -2.65192600 | -0.14408600 | -1.10210700 |
| F | -1.33859600 | 1.85525700  | 0.45839100  |
| F | 1.51763900  | 2.27007100  | 0.03709900  |

### **S<sub>0</sub>-IM<sub>1</sub>**

|   |             |            |             |
|---|-------------|------------|-------------|
| C | -1.54639500 | 0.01198200 | -0.10664900 |
| C | -0.78169200 | 1.10010000 | 0.10595800  |
| C | 0.68205000  | 0.73997900 | 0.30446100  |
| C | 1.30457500  | 0.33760200 | -0.90321100 |
| C | 0.64101200  | 0.79660900 | -0.14321500 |
| C | -0.74266300 | 1.17537300 | -0.18347400 |
| F | -2.82829700 | 0.02362100 | -0.37805000 |
| F | -1.13911600 | 2.34797900 | -0.09009200 |
| F | 1.28900100  | 1.17728600 | 1.39261600  |
| F | 2.61497300  | 0.30084100 | -0.99959700 |
| F | 1.49634500  | 1.66785500 | 0.37871300  |
| F | -1.13749700 | 2.32699300 | 0.31383000  |

### **S<sub>0</sub>-IM<sub>2</sub>**

|   |               |               |               |
|---|---------------|---------------|---------------|
| C | -1.3580487156 | 0.7395702722  | -0.0479319369 |
| C | -0.1111549297 | 1.1734077112  | 0.1236329785  |
| C | 0.8460572839  | 0.0030430530  | 0.1861177397  |
| C | 1.6908636768  | 0.0036753976  | -1.0851688816 |
| C | -0.1086198021 | -1.1692837904 | 0.1178795725  |

|   |               |               |               |
|---|---------------|---------------|---------------|
| C | -1.3557850981 | -0.7388049309 | -0.0480823385 |
| F | -2.4582791131 | 1.4297287109  | -0.1949804693 |
| F | 0.3352363809  | 2.4081674008  | 0.1437282401  |
| F | 1.5735173438  | 0.0013170342  | 1.3280444363  |
| F | 2.9268760061  | -0.0156238235 | -0.7196784381 |
| F | 0.3402166474  | -2.4034288900 | 0.1412105069  |
| F | -2.4537816801 | -1.4317531451 | -0.1955414096 |

### S<sub>1</sub>-MIN

|   |              |              |               |
|---|--------------|--------------|---------------|
| C | 0.0936554723 | 0.0000001830 | -1.4577258324 |
| C | 0.0014961967 | 1.2122355540 | -0.7128344645 |
| C | 0.0014962067 | 1.2122355565 | 0.7128344668  |
| C | 0.0936554766 | 0.0000001839 | 1.4577258320  |
| C | 0.0014976552 | 1.2122353340 | 0.7128345090  |
| C | 0.0014976679 | 1.2122353362 | -0.7128345124 |
| F | 0.3177706583 | 0.0000000437 | -2.7187229740 |
| F | 0.1275920863 | 2.3585956000 | -1.3393481644 |
| F | 0.1275921182 | 2.3585956023 | 1.3393481641  |
| F | 0.3177706528 | 0.0000000458 | 2.7187229748  |
| F | 0.1275961923 | 2.3585951592 | 1.3393480526  |
| F | 0.1275962387 | 2.3585951608 | -1.3393480516 |

### S<sub>1</sub>-TS<sub>1</sub>

|   |               |               |               |
|---|---------------|---------------|---------------|
| C | 1.4949167040  | -0.0109047616 | -0.1083535142 |
| C | 0.7465675811  | -1.1747297233 | -0.0400212051 |
| C | -0.7020883887 | -0.9898221374 | 0.0026686529  |
| C | -1.3741052388 | -0.0001863611 | -0.8392608167 |
| C | -0.6921840318 | 0.9936397286  | 0.0131752196  |
| C | 0.7330252776  | 1.1406433330  | 0.0332228147  |
| F | 2.8069859236  | 0.0343927025  | -0.2100340592 |
| F | 1.2643038087  | -2.3785535681 | 0.0446596077  |
| F | -1.4118798414 | -1.8258791579 | 0.7290985871  |
| F | -2.6940600602 | -0.0365484078 | -0.7011822155 |
| F | -1.3327746874 | 1.8838024027  | 0.7464244485  |
| F | 1.2265179531  | 2.3641459504  | 0.0184094802  |

### S<sub>0</sub>/S<sub>1</sub>-MSX

|   |               |               |               |
|---|---------------|---------------|---------------|
| C | 0.1021828172  | 0.0000915466  | -1.5034747327 |
| C | 0.0280088704  | 1.1536950447  | -0.7402895141 |
| C | -0.0699422495 | 0.9512357410  | 0.7008831887  |
| C | 0.7877526636  | -0.0001281637 | 1.3986155533  |
| C | -0.0700363857 | -0.9513184631 | 0.7007617715  |
| C | 0.0278936385  | -1.1536021422 | -0.7404371818 |
| F | 0.3140827042  | 0.0001638916  | -2.8000536406 |

|   |               |               |               |
|---|---------------|---------------|---------------|
| F | -0.0394250737 | 2.3614752856  | -1.2462049023 |
| F | -0.8164542507 | 1.7986915156  | 1.3794855268  |
| F | 0.6603682814  | -0.0002059865 | 2.7179650592  |
| F | -0.8166356953 | -1.7987844300 | 1.3792552127  |
| F | -0.0396613206 | -2.3613108395 | -1.2465073407 |

### S<sub>2</sub>-MIN

|   |               |               |               |
|---|---------------|---------------|---------------|
| C | 0.0000000448  | 1.4641632088  | 0.2784356243  |
| C | 1.2371032540  | 0.6711155042  | 0.1950783447  |
| C | 1.2392034532  | -0.6674046716 | -0.1867214822 |
| C | -0.0000000463 | -1.4587688575 | -0.2905550370 |
| C | -1.2392035082 | -0.6674046470 | -0.1867212245 |
| C | -1.2371031982 | 0.6711155254  | 0.1950786116  |
| F | -0.0000000434 | 2.5456526303  | -0.5057470636 |
| F | 2.3727653153  | 1.3296964558  | 0.2511396157  |
| F | 2.3722916293  | -1.3297738198 | -0.2321703855 |
| F | 0.0000000400  | -2.5583141317 | 0.4632120620  |
| F | -2.3722917142 | -1.3297737393 | -0.2321700320 |
| F | -2.3727652263 | 1.3296965425  | 0.2511399664  |

### S<sub>2</sub>/S<sub>1</sub>-MSX

|   |               |               |               |
|---|---------------|---------------|---------------|
| C | -0.0004738878 | 1.4115923903  | 0.0040201345  |
| C | 1.2488523094  | 0.6758119098  | -0.1396258929 |
| C | 1.2748718673  | -0.6943164652 | -0.0291049830 |
| C | 0.0000021073  | -1.2795280793 | 0.3321137306  |
| C | -1.2743319102 | -0.6951631541 | -0.0323515980 |
| C | -1.2489410936 | 0.6749822807  | -0.1428070584 |
| F | -0.0019430182 | 2.3977981458  | 0.9003619779  |
| F | 2.3331022254  | 1.3667199948  | -0.3909476131 |
| F | 2.2105221866  | -1.4418104421 | -0.6028518150 |
| F | -0.0006326760 | -2.3379787087 | 1.1065624953  |
| F | -2.2080210499 | 1.4432780491  | -0.6084790818 |
| F | -2.3330060604 | 1.3651701775  | -0.3968902963 |

### T<sub>1</sub>-MIN

|   |               |               |               |
|---|---------------|---------------|---------------|
| C | -0.0000000560 | -1.4880611797 | -0.0597809075 |
| C | -1.2474500666 | -0.7108796623 | -0.2159687521 |
| C | -1.2440624895 | 0.6285891325  | -0.0460434015 |
| C | -0.0000000072 | 1.3290992020  | 0.0451034887  |
| C | 1.2440624124  | 0.6285891028  | -0.0460442065 |
| C | 1.2474499668  | -0.7108797368 | -0.2159691101 |
| F | 0.0000001283  | -2.2918187406 | 1.0063023916  |
| F | -2.3575052125 | -1.3824351616 | -0.4437373184 |
| F | -2.3468191545 | 1.3459055054  | -0.0925559729 |

|   |              |               |               |
|---|--------------|---------------|---------------|
| F | 0.0000001611 | 2.5871555463  | 0.4212408790  |
| F | 2.3468191557 | 1.3459053727  | -0.0925560659 |
| F | 2.3575051619 | -1.3824353805 | -0.4437370244 |

### T<sub>2</sub>-MIN

|   |               |               |               |
|---|---------------|---------------|---------------|
| C | -0.0000000290 | -1.5142137883 | -0.0805533168 |
| C | -1.2248796657 | -0.7234788874 | -0.1346044549 |
| C | -1.2155148330 | 0.6668876788  | -0.0333825662 |
| C | 0.0000000227  | 1.3723373021  | 0.0419546646  |
| C | 1.2155148526  | 0.6668876404  | -0.0333826846 |
| C | 1.2248796267  | -0.7234789329 | -0.1346045297 |
| F | -0.0000000205 | -2.5026446616 | 0.8248129455  |
| F | -2.3596981799 | -1.3445634027 | -0.3738966253 |
| F | -2.3416466005 | 1.3378554946  | -0.0762052009 |
| F | 0.0000000504  | 2.6698536488  | 0.2662178451  |
| F | 2.3416466570  | 1.3378553970  | -0.0762053583 |
| F | 2.3596981192  | -1.3445634886 | -0.3738967187 |

### T<sub>2</sub>/S<sub>1</sub>-MSX

|   |               |               |               |
|---|---------------|---------------|---------------|
| C | 0.0246476714  | -0.0114353357 | 1.3631247375  |
| C | -0.1046150883 | -1.2515066697 | 0.6410303523  |
| C | 0.0321486855  | -1.2111626201 | -0.7883596783 |
| C | 0.0629646056  | 0.0090879948  | -1.5096830170 |
| C | 0.0209227401  | 1.2261604331  | -0.8074843524 |
| C | -0.0295294223 | 1.2102691867  | 0.6094658283  |
| F | -0.4277219502 | 0.0258515397  | 2.6079728077  |
| F | 0.2763712393  | -2.3629478346 | 1.2534601320  |
| F | -0.0055882702 | -2.3391077799 | -1.4532841459 |
| F | -0.0761945876 | -0.0078975787 | -2.8187870247 |
| F | 0.2329482796  | 2.3634800572  | -1.4358524254 |
| F | 0.0098140471  | 2.3481279272  | 1.2572066257  |

### T<sub>2</sub>/T<sub>1</sub>-MSX

|   |               |               |               |
|---|---------------|---------------|---------------|
| C | 0.0000000906  | -1.5633147493 | 0.2120648283  |
| C | -1.0875581768 | -0.7719039102 | -0.1850347352 |
| C | -1.1580694185 | 0.6880336253  | -0.0299821995 |
| C | -0.0000006943 | 1.4268077381  | 0.0665102106  |
| C | 1.1580691205  | 0.6880319443  | -0.0299817877 |
| C | 1.0875592218  | -0.7719044766 | -0.1850341169 |
| F | -0.0000004175 | -2.5011507483 | 1.1736561047  |
| F | -2.1284570413 | -1.2831711368 | -0.8155964349 |
| F | -2.3380378629 | 1.2437592728  | 0.0059318431  |
| F | 0.0000006733  | 2.7119391981  | 0.3715760971  |
| F | 2.3380365576  | 1.2437596041  | 0.0059309571  |



|                                        |               |               |               |
|----------------------------------------|---------------|---------------|---------------|
| F                                      | 2.1284579474  | -1.2831715116 | -0.8155970168 |
| <b>T<sub>1</sub>/S<sub>1</sub>-MSX</b> |               |               |               |
| C                                      | -0.0002400583 | -1.3977090843 | 0.0948175991  |
| C                                      | -1.2501431736 | -0.6822668307 | 0.0420260657  |
| C                                      | -1.2518528225 | 0.6696623515  | -0.0002930623 |
| C                                      | 0.0002380219  | 1.4015747826  | -0.0616541168 |
| C                                      | 1.2519101814  | 0.6700007602  | -0.0005453463 |
| C                                      | 1.2500968931  | -0.6818781633 | 0.0422647026  |
| F                                      | -0.0000717113 | -2.7072545137 | 0.2590887016  |
| F                                      | -2.3574649347 | -1.3732496507 | -0.1573504917 |
| F                                      | -2.3660683519 | 1.3405583110  | -0.2299967764 |
| F                                      | 0.0000583319  | 2.6918589482  | 0.2152691871  |
| F                                      | 2.3661003518  | 1.3405594637  | -0.2309247709 |
| F                                      | 2.3574372720  | -1.3731223744 | -0.1564476917 |
| <b>T<sub>1</sub>/S<sub>0</sub>-MSX</b> |               |               |               |
| C                                      | -0.1147291641 | -0.0009524639 | 1.3778510210  |
| C                                      | 0.2829732453  | -1.2378481393 | 0.6589154472  |
| C                                      | 0.0362875295  | -1.2492930732 | -0.6709128074 |
| C                                      | -0.1574498555 | -0.0001181984 | -1.3381935202 |
| C                                      | 0.0363627145  | 1.2501880638  | -0.6702750730 |
| C                                      | 0.2823654426  | 1.2375681958  | 0.6603622425  |
| F                                      | -1.4296263407 | 0.0002674913  | 1.6498634534  |
| F                                      | 0.7048965379  | -2.2906473553 | 1.3263135101  |
| F                                      | 0.1202927101  | -2.3349110135 | -1.4113222525 |
| F                                      | -0.5740835367 | 0.0003794184  | -2.5818957668 |
| F                                      | 0.1242842694  | 2.3353605436  | -1.4109691997 |
| F                                      | 0.7045943976  | 2.2889258507  | 1.3290727852  |

**S1.** The details for the optimization of S<sub>1</sub>/S<sub>0</sub>-MSX, S<sub>2</sub>/S<sub>1</sub>-MSX, S<sub>0</sub>/T<sub>1</sub>-MSX and T<sub>2</sub>/T<sub>1</sub>-MSX.

① Optimization of S<sub>1</sub>/S<sub>0</sub>-MSX

\*\*\*, C6F6 CAS67-S1/S0 conical intersection optimization  
memory, 500, m  
symmetry, nosym  
geomtyp=xyz  
geom={  
12  
C6F6

|   |               |               |               |
|---|---------------|---------------|---------------|
| C | 0.1021828172  | 0.0000915466  | -1.5034747327 |
| C | 0.0280088704  | 1.1536950447  | -0.7402895141 |
| C | -0.0699422495 | 0.9512357410  | 0.7008831887  |
| C | 0.7877526636  | -0.0001281637 | 1.3986155533  |
| C | -0.0700363857 | -0.9513184631 | 0.7007617715  |
| C | 0.0278936385  | -1.1536021422 | -0.7404371818 |
| F | 0.3140827042  | 0.0001638916  | -2.8000536406 |
| F | -0.0394250737 | 2.3614752856  | -1.2462049023 |
| F | -0.8164542507 | 1.7986915156  | 1.3794855268  |
| F | 0.6603682814  | -0.0002059865 | 2.7179650592  |
| F | -0.8166356953 | -1.7987844300 | 1.3792552127  |
| F | -0.0396613206 | -2.3613108395 | -1.2465073407 |

}

basis=6-31g\*

{hf  
wf, 90, 1, 0  
}

{multi,  
occ, 49  
closed, 42  
wf, 90, 1, 0  
state, 2

CPMCSCF, NACM, 1.1, 2.1, accu=1.0d-6, record=5100.1

CPMCSCF, GRAD, 1.1, spin=0, accu=1.0d-6, record=5101.1

CPMCSCF, GRAD, 2.1, spin=0, accu=1.0d-6, record=5102.1

}

{Force  
SAMC, 5100.1  
CONICAL,6100.1}

{Force  
SAMC, 5101.1  
CONICAL,6100.1}

{Force  
SAMC, 5102.1  
CONICAL,6100.1}

optg, startcmd=multi

② Optimization of the S<sub>2</sub>/S<sub>1</sub>-MSX

\*\*\*,C6F6 cas67-S2/S1 conical optimization

memory, 500, m

symmetry, nosym

geomtyp=xyz

geom={

12

C6F6

|   |               |               |               |
|---|---------------|---------------|---------------|
| C | -0.0004738878 | 1.4115923903  | 0.0040201345  |
| C | 1.2488523094  | 0.6758119098  | -0.1396258929 |
| C | 1.2748718673  | -0.6943164652 | -0.0291049830 |
| C | 0.0000021073  | -1.2795280793 | 0.3321137306  |
| C | -1.2743319102 | -0.6951631541 | -0.0323515980 |
| C | -1.2489410936 | 0.6749822807  | -0.1428070584 |
| F | -0.0019430182 | 2.3977981458  | 0.9003619779  |
| F | 2.3331022254  | 1.3667199948  | -0.3909476131 |
| F | 2.2105221866  | -1.4418104421 | -0.6028518150 |
| F | -0.0006326760 | -2.3379787087 | 1.1065624953  |
| F | -2.2080210499 | -1.4432780491 | -0.6084790818 |
| F | -2.3330060604 | 1.3651701775  | -0.3968902963 |

}

basis=6-311G\*\*

{hf

wf, 90, 1, 0

}

{multi,

occ, 49

closed, 42

wf, 90, 1, 0

state, 3

CPMCSCF, NACM, 2.1, 3.1, accu=1.0d-7, record=5100.1

CPMCSCF, GRAD, 2.1, spin=0, accu=1.0d-7, record=5101.1

CPMCSCF, GRAD, 3.1, spin=0, accu=1.0d-7, record=5102.1

}

{Force

SAMC, 5100.1

CONICAL,6100.1}

```
{Force
SAMC, 5101.1
CONICAL,6100.1}
```

```
{Force
SAMC, 5102.1
CONICAL,6100.1}
```

```
optg, startcmd=multi
```

### ③ Optimization of the $S_0/T_1$ -MSX

```
***, C6F6 CAS67-S0/T1 conical optimization
```

```
memory, 500, m
```

```
symmetry, nosym
```

```
geomtyp=xyz
```

```
geom={
```

```
12
```

```
C6F6
```

|   |               |               |               |
|---|---------------|---------------|---------------|
| C | -0.1147255239 | -0.0009522995 | 1.3778513963  |
| C | 0.2829713823  | -1.2378493956 | 0.6589137745  |
| C | 0.0362877583  | -1.2492929342 | -0.6709145517 |
| C | -0.1574491183 | -0.0001181109 | -1.3381949407 |
| C | 0.0363623470  | 1.2501880327  | -0.6702766587 |
| C | 0.2823629971  | 1.2375696119  | 0.6603606086  |
| F | -1.4296196870 | 0.0002670901  | 1.6498796584  |
| F | 0.7048892762  | -2.2906492447 | 1.3263132175  |
| F | 0.1202941524  | -2.3349108213 | -1.4113248062 |
| F | -0.5740793241 | 0.0003795761  | -2.5818983829 |
| F | 0.1242867263  | 2.3353599732  | -1.4109719167 |
| F | 0.7045869635  | 2.2889278422  | 1.3290724416  |

```
}
```

```
basis=6-31G*
```

```
{hf
```

```
wf, 90, 1, 0
```

```
}
```

```
{multi,
```

```
occ, 49
```

```
closed, 42
```

```
wf, 90, 1, 0
```

```
wf, 90, 1, 2
CPMCSCF, GRAD, 1.1, spin=0, accu=1.0d-6, record=5101.1
CPMCSCF, GRAD, 1.1, spin=1, accu=1.0d-6, record=5100.1
}
```

```
{Force
SAMC, 5101.1
CONICAL,6100.1, NODC}
```

```
{Force
SAMC, 5100.1
CONICAL, 6100.1, NODC}
```

```
optg, startcmd=multi
```

#### ④ Optimization of the $T_2/T_1$ -MSX

```
***,C6F6 cas67-T2/T1 conical optimization
```

```
memory, 500, m
```

```
symmetry, nosym
```

```
geomtyp=xyz
```

```
geom={
```

```
12
```

```
C6F6
```

|   |               |               |               |
|---|---------------|---------------|---------------|
| C | 0.0000000906  | -1.5633147493 | 0.2120648283  |
| C | -1.0875581768 | -0.7719039102 | -0.1850347352 |
| C | -1.1580694185 | 0.6880336253  | -0.0299821995 |
| C | -0.0000006943 | 1.4268077381  | 0.0665102106  |
| C | 1.1580691205  | 0.6880319443  | -0.0299817877 |
| C | 1.0875592218  | -0.7719044766 | -0.1850341169 |
| F | -0.0000004175 | -2.5011507483 | 1.1736561047  |
| F | -2.1284570413 | -1.2831711368 | -0.8155964349 |
| F | -2.3380378629 | 1.2437592728  | 0.0059318431  |
| F | 0.0000006733  | 2.7119391981  | 0.3715760971  |
| F | 2.3380365576  | 1.2437596041  | 0.0059309571  |
| F | 2.1284579474  | -1.2831715116 | -0.8155970168 |

```
}
```

```
basis=6-31G*
```

```
{hf
```

wf, 90, 1, 2  
}

{multi,  
occ, 49  
closed, 42  
wf, 90, 1, 2  
state, 2  
CPMCSCF, NACM, 1.1, 2.1, accu=1.0d-7, record=5100.1  
CPMCSCF, GRAD, 1.1, spin=1, accu=1.0d-7, record=5101.1  
CPMCSCF, GRAD, 2.1, spin=1, accu=1.0d-7, record=5102.1  
}

{Force  
SAMC, 5100.1  
CONICAL,6100.1}

{Force  
SAMC, 5101.1  
CONICAL,6100.1}

{Force  
SAMC, 5102.1  
CONICAL,6100.1}

optg, startcmd=multi
